# Supplementary material for: Targeting the Small GTPase Superfamily through Their Regulatory Proteins
Source: PubMed Central journal article supplement (PMC7204875; doi:10.1002/anie.201900585), 2020-01-30
Supplement: ANIE-59-6342-s001.pdf [file ANIE-59-6342-s001.pdf]

## **Author Contributions**

J.G. Writing - Original Draft: Lead; Writing - Review & Editing: Lead

F.v. Writing - Review & Editing: Supporting

P.B. Writing - Review & Editing: Supporting.
